# Supplementary material for: Physical fitness training in Subacute Stroke (PHYS-STROKE) - study protocol for a randomised controlled trial
Source: Springer Nature journal article supplement (doi:10.1186/1745-6215-15-45), 2014-02-03

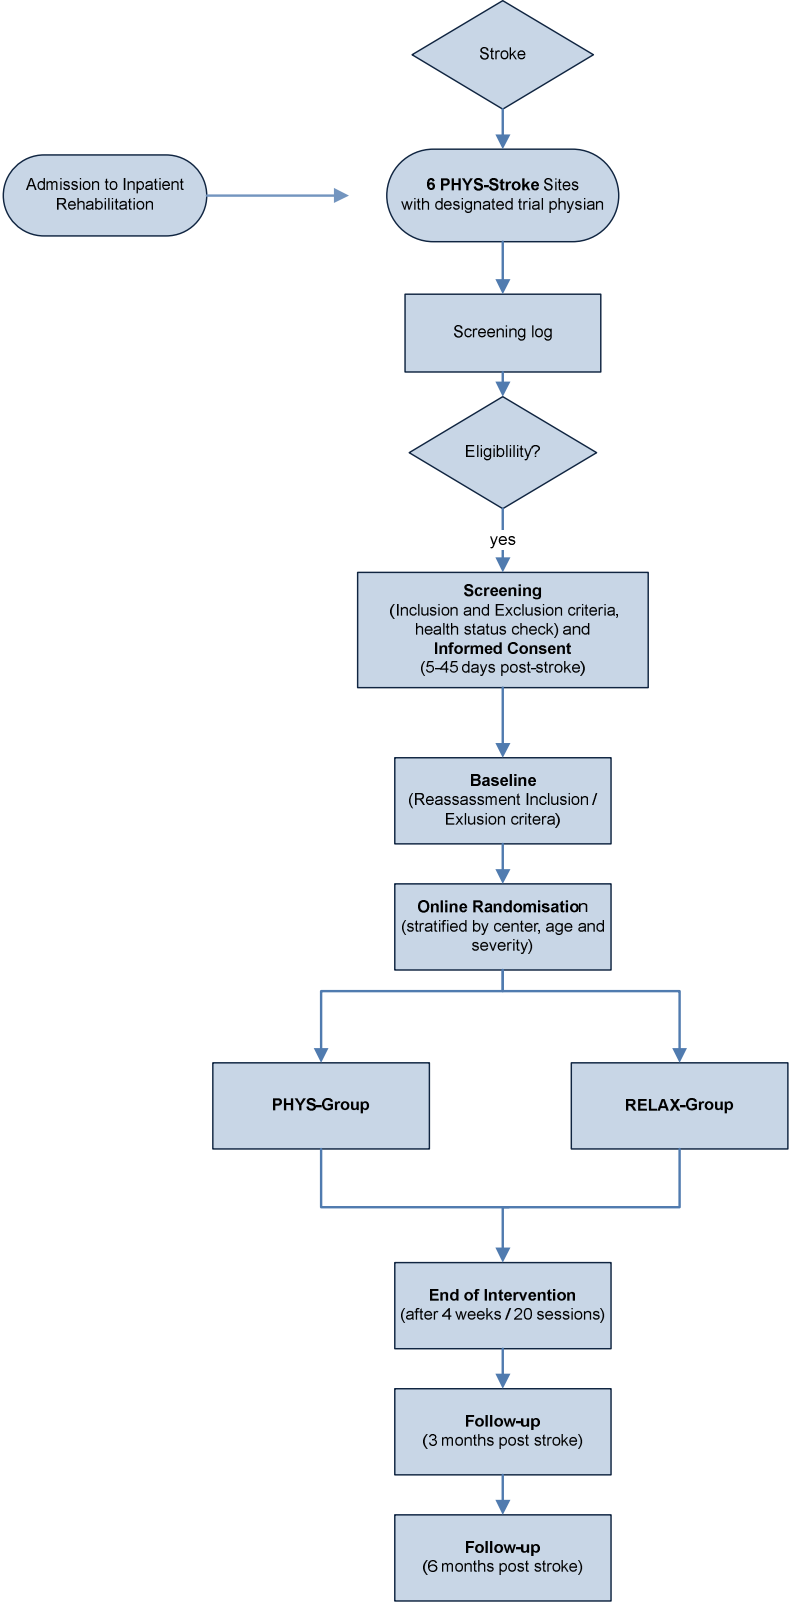

Supplement: 13063_2013_1935_MOESM3_ESM.pdf [file 13063_2013_1935_MOESM3_ESM.pdf]
